# Supplementary material for: Direct observation of micron-sized silica rattles to demonstrate movability of inner spheres in the silica compartment suspended in aqueous media
Source: Royal Society of Chemistry journal article supplement (doi:10.1039/c2sm06946f), 2012-01-01
Supplement: c2sm06946f.pdf [file c2sm06946f.pdf]

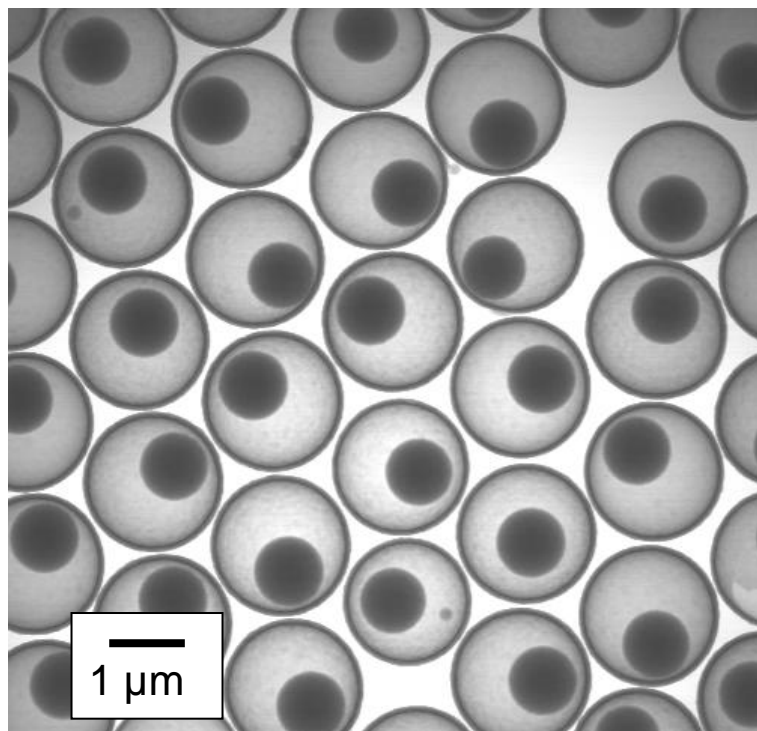

**Figure S1** TEM image of silica rattle particles without secondary silica particles

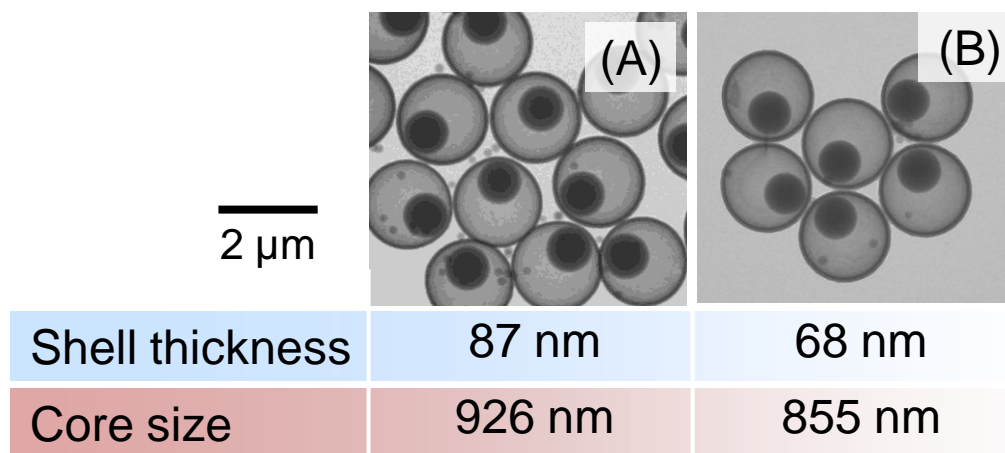

**Figure S2** TEM images of rattle particles before (A) and after (B) the immersion to basic solution, respectively.
